# Supplementary material for: A Proof-of-Concept for a Hypolipidemic Brown Trout Model
Source: MDPI journal article supplement (doi:10.3390/toxics12030219), 2024-03-15
Supplement: s1 [file s1]

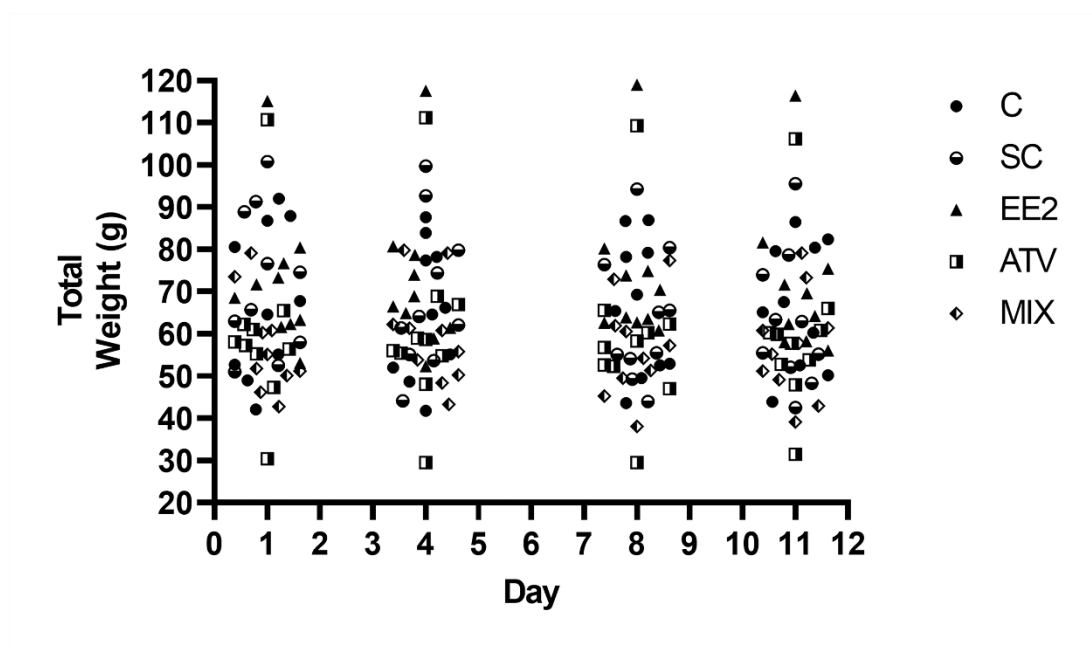

**Figure S1.** Juvenile brown trout weight ( $n=9$  fish/ group) in the different experimental groups (C – control, SC – solvent Control, EE2 – 17 $\alpha$ -ethinylestradiol, ATV – atorvastatin and MIX – mixture) at the distinct injection days.
